# Supplementary material for: Identifying the unmet health needs of patients with congenital hypogonadotropic hypogonadism using a web-based needs assessment: implications for online interventions and peer-to-peer support
Source: PubMed Central journal article supplement (PMC4059885; doi:10.1186/1750-1172-9-83), 2014-06-11
Supplement: 1750-1172-9-83-S1.pdf [file 1750-1172-9-83-S1.pdf]

**SUPPLEMENTAL MATERIALS:** Identifying the unmet health needs of patients with congenital hypogonadotropic hypogonadism using a web-based needs assessment: Implications for online interventions and peer-to-peer support

## 1. Summary of online survey results

### 2. Supplemental Figure S1: Patient-reported longest duration without healthcare among CHH men.

#### 1. Summary of online survey results

##### 1A. Sociodemographic information

*Age:* [open ended response]

19-29 yrs: 32/105 (30%)  
30-39 yrs: 39/105 (37%)  
40-49 yrs: 19/105 (18%)  
50-59 yrs: 11/105 (10%)  
60+ yrs: 4/105 (4%)

*Relationship status:* [multiple choice]

never been in a relationship: 24/104 (23%)  
single: 25/104 (24%)  
in a relationship: 16/104 (15%)  
married: 38/104 (36%)  
divorced: 1/104 (1%)

*Religion:* [open-ended question question]

Christian (protestant & evangelical): 25/90 (28%)  
Roman Catholicism: 17/90 (19%)  
Orthodox Christianity: 3/90 (3%)  
(Eastern & Russian)  
Islam: 5/90 (6%)  
Judaism: 2/90 (2%)  
Buddhism: 1/90 (1%)  
Hinduism: 1/90 (1%)  
Other: 10/90 (11%)  
(Paganism, Mormonism, Jehovah's Witness, secular humanist, personal faith)  
Atheism: 10/90 (11%)  
None: 16/90 (18%)

*Highest level of education:* [multiple choice]

elementary: 0/105 (0%)  
high school/vocational: 36/105 (34%)  
university: 38/105 (36%)  
post-graduate: 31/105 (30%)

*Employment:* [multiple choice]

student: 9/104 (9%)

working part-time: 9/104 (9%)

working full-time: 70/104 (67%)

retired: 6/104 (6%)

unemployed: 10/104 (10%)

*Type of employment:* [open ended question - responses included]

|                                                                                                                                                                                                                                                 |                                                                                                                                                                                                                                           |
|-------------------------------------------------------------------------------------------------------------------------------------------------------------------------------------------------------------------------------------------------|-------------------------------------------------------------------------------------------------------------------------------------------------------------------------------------------------------------------------------------------|
| <u><i>Business &amp; Finance</i></u><br>Business analyst/consultant<br>Economist<br>Finance                                                                                                                                                     | <u><i>Teaching &amp; Education</i></u><br>Teacher<br>Professor<br>School administrator                                                                                                                                                    |
| <u><i>Law &amp; Legal Services</i></u><br>Attorney<br>Legal assistant<br>Legislative consultant                                                                                                                                                 | <u><i>Psychology &amp; social Work</i></u><br>School Counselor<br>Counselor/mediator                                                                                                                                                      |
| <u><i>Healthcare &amp; Science</i></u><br>Dentist<br>Physician<br>Nurse<br>Pharmacist<br>Ambulance staff<br>Patient care assistant<br>Translation services<br>Biomedical scientist<br>Chemist/Lab Technician<br>Hospital finance/administration | <u><i>Engineering &amp; Information Technology (IT)</i></u><br>Engineer<br>Electrical Engineer<br>Applications engineer<br>Network Engineer<br>Computer systems management<br>Software developer<br>Computer programming<br>IT technician |
| <u><i>Service &amp; retail</i></u><br>Clerk<br>Sales/Retail<br>Personal trainer<br>Call center/customer services                                                                                                                                | <u><i>Management &amp; supervisors</i></u><br>Manager - small business<br>Manager – manufacturing<br>warehouse supervisor<br>Purchasing manager                                                                                           |
| <u><i>Laborer &amp; Manufacturing</i></u><br>Construction<br>Lawn care<br>Airline baggage<br>Warehouse<br>Milling machine operator<br>Quality control technician                                                                                | <u><i>Transportation</i></u><br>Public transportation driver<br>Limousine Service<br>Truck driver                                                                                                                                         |
| <u><i>Civil Service</i></u><br>civil servant<br>Postal worker<br>Juvenile services                                                                                                                                                              | <u><i>Arts &amp; Entertainment</i></u><br>Composer<br>Performing arts<br>Graphic design                                                                                                                                                   |
| <u><i>Religious clergy</i></u><br>clergy<br>Buddhist monk                                                                                                                                                                                       |                                                                                                                                                                                                                                           |

## **1B. Healthcare literacy**

- *How confident are you filling out medical forms by yourself?*  
Extremely: 45/105 (43%)  
quite a bit: 34/105 (32%)  
somewhat: 25/105 (24%)  
a little bit: 1/105 (1%)  
not at all: 0/105 (0%)

## **1C. Health information seeking patterns:**

- *Where have you searched for information to learn about CHH? (check all that apply)*  
internet (i.e. Wikipedia): 101/105 (96%)  
online community (social media/chat): 81/105 (77%)  
healthcare professionals: 74/105 (70%)  
medical literature: 49/105 (47%)  
family/friends: 12/105 (11%)  
other: 0/105 (0%)
- *From your experience, please rank the 3 most important sources:*  
healthcare professionals: weighted score 166  
internet (i.e. wikipedia): weighted score 150  
online community (social media/chat): weighted score 146  
medical literature: weighted score 93  
family/friends: weighted score 18

## **1D. Interactions with healthcare system/providers**

- *Within the healthcare system, have you ever experienced discrimination because of CHH?*  
No: 89/105 (85%)  
Yes: 16/105 (15%)
- *Have you ever had a consultation or received treatment at an academic health center (such as a teaching hospital or research center)?*  
No: 51/105 (49%)  
Yes: 54/105 (51%)
- *Is there a healthcare provider (i.e. doctor or nurse) who you feel really understands the medical aspects of your CHH?*  
No: 35/105 (33%)  
Yes: 70/105 (67%)
- *Is there a healthcare provider (i.e. doctor or nurse) who you feel understands your feelings about having CHH?*  
No: 65/104 (62.5%)  
Yes: 39/104 (37.5%)
- *Has a healthcare provider (either general practitioner or specialist) ever offered you counseling or a referral for professional counseling?*  
No: 79/105 (75%)  
Yes: 26/105 (25%)

## 1E. *Diagnosis, treatment & adherence*

- *At what age were you diagnosed with CHH?* [open ended question]  
mean±SD: 18±6 years  
range: neonatal – 32 years  
median: 18 years
- *Lifetime duration of treatment* [calculated from start of treatment]  
mean±SD: 18±12 years  
range: 0 – 46 years  
median: 16 years
- *What treatments have you had for CHH? (check all that apply)*  
testosterone (injections, pellets, patches, or gel): 99/105  
gonadotropin/fertility injections: 37/105  
none: 3/105 (two recently diagnosed patients)
- *What is the longest period of time that you have gone without medical care (not under the care of a doctor or healthcare provider for your CHH):* [open-ended]  
Never: 24/93 (26%)  
<6 months: 27/93 (29%)  
6-12 months: 7/93 (8%)  
13-24 months: 15/93 (16%)  
25-36 months: 8/93 (9%)  
36+ months: 12/93 (12%)
- *What is the longest period of time that you have been off your CHH medication (not at the instruction of your doctor or healthcare provider):* [open-ended]  
never: 28/87 (32%)  
<6 months: 20/87 (23%)  
6-12 months: 3/87 (3%)  
13-24 months: 17/87 (20%)  
25-36 months: 6/87 (7%)  
36+ months: 13/87 (15%)

**Figure S1. Patient-reported longest duration without healthcare among CHH men.**

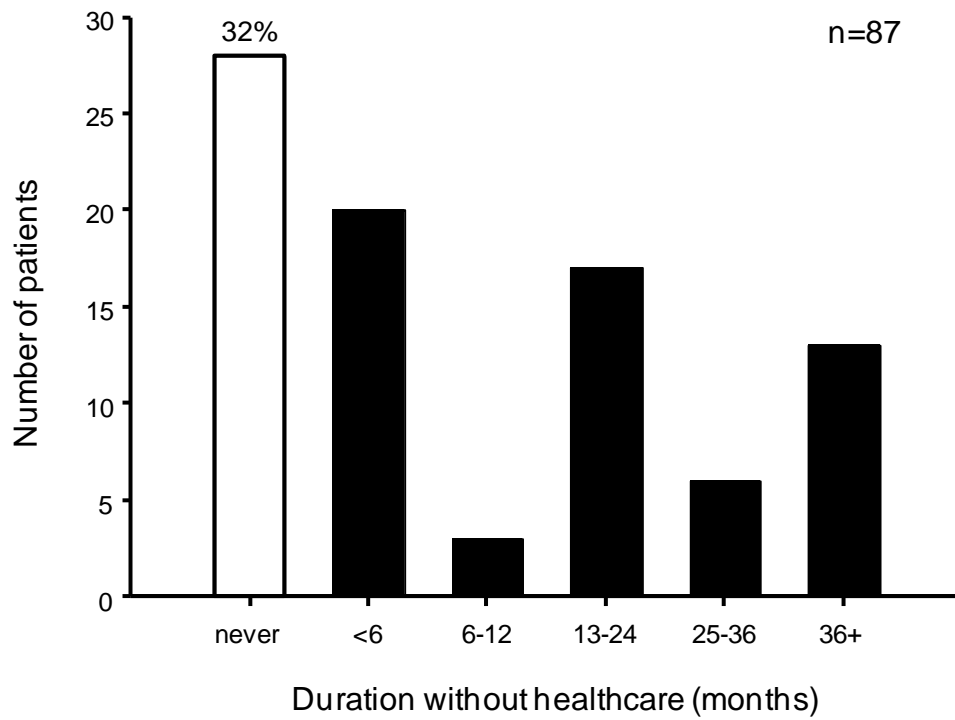

Healthcare continuity as assessed by patient-reported longest period without contact with a healthcare professional (n=87). In total, 32% of CHH men reported never having a break in their continuity of healthcare while 41% had gaps in care exceeding 1 year.
